# Supplementary material for: Semi-automated left ventricular segmentation based on a guide point model approach for 3D cine DENSE cardiovascular magnetic resonance
Source: Springer Nature journal article supplement (doi:10.1186/1532-429x-16-8), 2014-01-14

## Image Processing

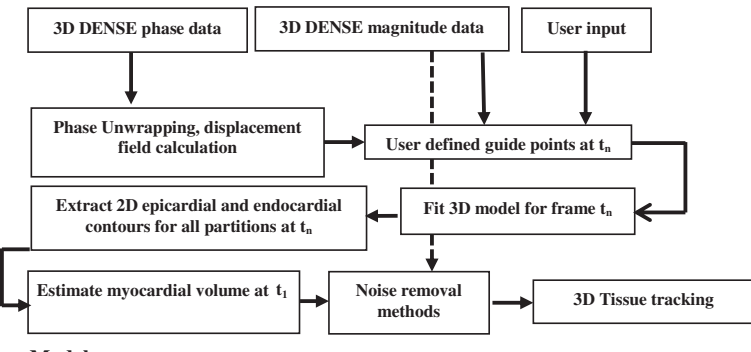

## Model

### Propagation

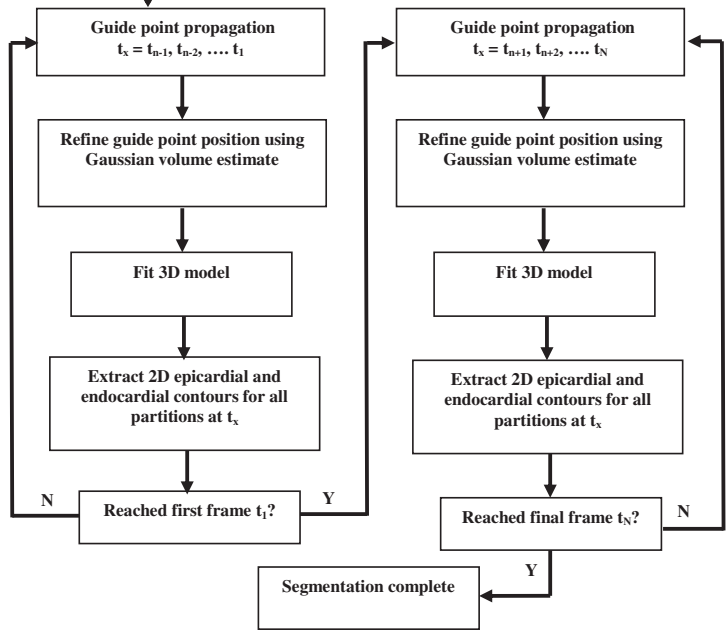

Supplement: 12968_2013_3932_MOESM1_ESM.pdf [file 12968_2013_3932_MOESM1_ESM.pdf]
